# Supplementary material for: Field-based detection of bacteria using nanopore sequencing: Method evaluation for biothreat detection in complex samples
Source: PubMed Central journal article supplement (PMC10684088; doi:10.1371/journal.pone.0295028), 2023-11-28

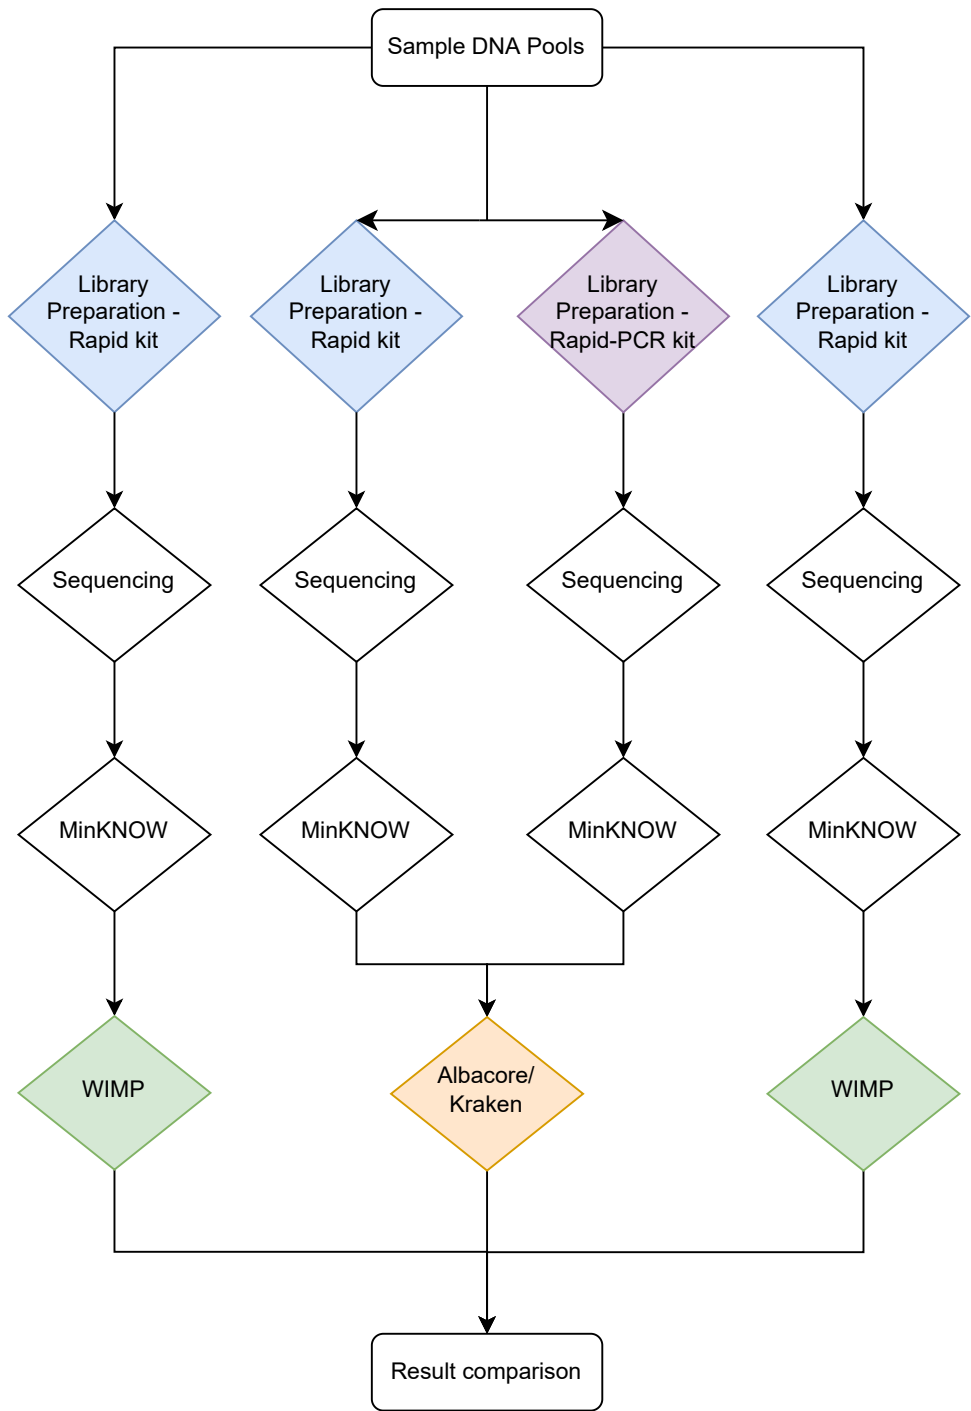

Supplement: pone.0295028.s001.pdf [file pone.0295028.s001.pdf]
